# Supplementary material for: CADM1 is a strong neuroblastoma candidate gene that maps within a 3.72 Mb critical region of loss on 11q23
Source: BMC Cancer. 2008 Jun 17;8:173. doi: 10.1186/1471-2407-8-173 (PMC2442116; doi:10.1186/1471-2407-8-173)
Supplement: Additional File 1 — Clinical characteristics of 25 additionally profiled primary NB tumours [file 1471-2407-8-173-S1.xls]

## Sheet: Sheet 1
	ID	Stage	Age a	Survival b	OS c	Event d
	AD-248	4	70	0	29	0
	AD-247	4s	1	0	70	0
	AD-246	2	17	0	58	0
	AD-245	1	15	0	111	0
	AD-244	4s	5	1	-	1
	AD-243	4s	4	0	48	0
	AD-242	3	17	1	7	1
	AD-241	3	157	0	43	1
	AD-238	1	6	0	142	1
	AD-237	4	21	0	25	0
	AD-236	3	7	0	3	0
	AD-235	2	2	0	83	0
	AD-234	3	20	1	21	1
	AD-233	4	13	0	85	0
	AD-232	4	153	1	161	1
	AD-230	1	2	0	71	0
	AD-229	4	46	1	9	1
	AD-226	1	23	0	134	0
	AD-224	4	12	0	70	0
	AD-216	4	67	1	31	1
	AD-215	3	8	0	41	0
	AD-211	3	8	0	69	1
	AD-197	2	16	0	3	1
	AD-196	4	20	1	17	1
	AJ-88	4	49	1	19	1
	a Age at diagnosis, in months
	b 0= alive, 1= deceased
	c Overall survival (in months from diagnosis till death or last follow-up)
	d 0= no event, 1= event
	- data not available
